# Supplementary material for: Bacteria in clouds biodegrade atmospheric formic and acetic acids
Source: Copernicus journal article supplement (doi:10.5194/acp-24-5181-2024), 2024-05-03
Supplement: Supplementary file 1 [file acp-24-5181-2024-supplement.pdf]

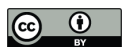

*Supplement of*

## **Bacteria in clouds biodegrade atmospheric formic and acetic acids**

**Leslie Nuñez López et al.**

*Correspondence to:* Barbara Ervens ([barbara.ervens@uca.fr](mailto:barbara.ervens@uca.fr))

The copyright of individual parts of the supplement might differ from the article licence.

**Table S1.** Irreversible processes in the aqueous phase. The kinetic data are the same as used in the model study by Khaled et al. (2021). The biodegradation rate constants are calculated based on the lab data by Vařtilingom et al. (2010).

| Chemical reactions |                                                                                |   |                                                                      |                                                           |                       |
|--------------------|--------------------------------------------------------------------------------|---|----------------------------------------------------------------------|-----------------------------------------------------------|-----------------------|
|                    | Reactants                                                                      |   | Products                                                             | k [M <sup>-1</sup> s <sup>-1</sup> ]                      | E <sub>a</sub> /R [K] |
| R1                 | SO <sub>2</sub> + O <sub>3</sub>                                               | → | S(VI) + O <sub>2</sub>                                               | 2.4·10 <sup>4</sup>                                       |                       |
| R2                 | HSO <sub>3</sub> <sup>-</sup> + O <sub>3</sub>                                 | → | S(VI) + O <sub>2</sub>                                               | 3.7·10 <sup>5</sup>                                       | 5530                  |
| R3                 | SO <sub>3</sub> <sup>2-</sup> + O <sub>3</sub>                                 | → | S(VI) + O <sub>2</sub>                                               | 1.5·10 <sup>9</sup>                                       | 5280                  |
| R4                 | H <sub>2</sub> O <sub>2</sub> + HSO <sub>3</sub> <sup>-</sup> + H <sup>+</sup> | → | S(VI) + H <sub>2</sub> O                                             | 7.2·10 <sup>7</sup> M <sup>-2</sup> s <sup>-1</sup>       | 4000                  |
| R5                 | HO <sub>2</sub> + HO <sub>2</sub>                                              | → | H <sub>2</sub> O <sub>2</sub> + O <sub>2</sub>                       | 8.3·10 <sup>5</sup>                                       | 2720                  |
| R6                 | O <sub>2</sub> <sup>-</sup> + HO <sub>2</sub>                                  | → | H <sub>2</sub> O <sub>2</sub> + O <sub>2</sub>                       | 9.7·10 <sup>7</sup>                                       | 1060                  |
| R7                 | OH + CH <sub>2</sub> (OH) <sub>2</sub>                                         | → | HO <sub>2</sub> + HCOOH                                              | 1·10 <sup>9</sup>                                         | 1000                  |
| R8                 | OH + CH <sub>3</sub> OOH                                                       | → | CH <sub>3</sub> O <sub>2</sub> + H <sub>2</sub> O                    | 2.4·10 <sup>7</sup>                                       | 1680                  |
| R9                 | OH + CH <sub>3</sub> OOH                                                       | → | HO <sub>2</sub> + HCOOH                                              | 61·10 <sup>6</sup>                                        | 1680                  |
| R10                | O <sub>3</sub> + O <sub>2</sub> <sup>-</sup> (+ H <sup>+</sup> )               | → | OH + 2 O <sub>2</sub>                                                | 1.5·10 <sup>9</sup>                                       | 2200                  |
| R11                | OH + CHOCHO                                                                    | → | HO <sub>2</sub> + CHOCOOH                                            | 1.1·10 <sup>9</sup>                                       | 1516                  |
| R12                | OH + CHOCOOH                                                                   | → | HO <sub>2</sub> + H <sub>2</sub> C <sub>2</sub> O <sub>4</sub>       | 3.6·10 <sup>8</sup>                                       | 1000                  |
| R13                | OH + CHOCOO <sup>-</sup>                                                       | → | HO <sub>2</sub> + H <sub>2</sub> C <sub>2</sub> O <sub>4</sub>       | 2.9·10 <sup>9</sup>                                       | 4300                  |
| R14                | OH + C <sub>2</sub> O <sub>4</sub> <sup>2-</sup>                               | → | O <sub>2</sub> <sup>-</sup> + 2 CO <sub>2</sub> + OH <sup>-</sup>    | 1.6·10 <sup>8</sup>                                       | 4300                  |
| R15                | OH + HC <sub>2</sub> O <sub>4</sub> <sup>-</sup>                               | → | HO <sub>2</sub> + 2 CO <sub>2</sub> + OH <sup>-</sup>                | 1.9·10 <sup>8</sup>                                       | 2800                  |
| R16                | OH + H <sub>2</sub> C <sub>2</sub> O <sub>4</sub>                              | → | HO <sub>2</sub> + 2 CO <sub>2</sub> + H <sub>2</sub> O               | 1.4·10 <sup>6</sup>                                       |                       |
| R17                | OH + CH <sub>3</sub> C(O)COO <sup>-</sup>                                      | → | HO <sub>2</sub> + CO <sub>2</sub> + CH <sub>3</sub> COO <sup>-</sup> | 7.2·10 <sup>8</sup>                                       |                       |
| R18                | OH + CH <sub>3</sub> C(O)COOH                                                  | → | HO <sub>2</sub> + H <sub>2</sub> O + CH <sub>3</sub> COOH            | 1.2·10 <sup>8</sup>                                       |                       |
| R19                | OH + CH <sub>3</sub> CHO                                                       | → | HO <sub>2</sub> + CO <sub>2</sub> + CH <sub>3</sub> COOH             | 3.6·10 <sup>9</sup>                                       |                       |
| R20                | OH + CH <sub>3</sub> C(O)CHO                                                   | → | HO <sub>2</sub> + CHC(O)COOH                                         | 1.1·10 <sup>9</sup>                                       | 1516                  |
| R21                | OH + HCOO <sup>-</sup>                                                         | → | HO <sub>2</sub> + CO <sub>2</sub> + H <sub>2</sub> O                 | 3.2·10 <sup>9</sup>                                       | 1000                  |
| R22                | OH + HCOOH                                                                     | → | HO <sub>2</sub> + CO <sub>2</sub> + H <sub>2</sub> O                 | 1.3·10 <sup>8</sup>                                       | 1000                  |
| R23                | CH <sub>3</sub> O <sub>2</sub> + CH <sub>3</sub> O <sub>2</sub>                | → | CH <sub>2</sub> O + CH <sub>3</sub> OH + HO <sub>2</sub>             | 1.7·10 <sup>8</sup>                                       | 2200                  |
| R24                | H <sub>2</sub> O <sub>2</sub> + OH                                             | → | HO <sub>2</sub> + H <sub>2</sub> O                                   | 3·10 <sup>7</sup>                                         | 1680                  |
| R25                | OH + WSOC                                                                      | → | WSOC + HO <sub>2</sub>                                               | 3.8·10 <sup>8</sup>                                       |                       |
| R26                | OH + CH <sub>2</sub> OHCHO                                                     | → | CH <sub>2</sub> OHCOOH + HO <sub>2</sub>                             | 1.2·10 <sup>9</sup>                                       |                       |
| R27                | OH + CH <sub>2</sub> OHCOOH                                                    | → | CHOCOOH + HO <sub>2</sub>                                            | 5.4·10 <sup>8</sup>                                       |                       |
| R28                | OH + CH <sub>2</sub> OHCOO <sup>-</sup>                                        | → | CHOCOOH + HO <sub>2</sub>                                            | 1.2·10 <sup>9</sup>                                       |                       |
| R29                | OH + CH <sub>3</sub> COOH                                                      | → | 0.85 CHOCOOH + 0.15 HCHO + HO <sub>2</sub>                           | 1.5·10 <sup>7</sup>                                       | 1330                  |
| R30                | OH + CH <sub>3</sub> COO <sup>-</sup>                                          | → | 0.85 CHOCOOH + 0.15 HCHO + HO <sub>2</sub>                           | 1·10 <sup>8</sup>                                         | 1800                  |
| R31                | CH <sub>3</sub> (O)O <sub>2</sub> + O <sub>2</sub> <sup>-</sup>                | → | CH <sub>3</sub> COOH                                                 | 1·10 <sup>9</sup>                                         |                       |
| R32                | CH <sub>3</sub> (O)O <sub>2</sub> + CH <sub>3</sub> (O)O <sub>2</sub>          | → | 2 CH <sub>3</sub> O <sub>2</sub>                                     | 1.5·10 <sup>8</sup>                                       |                       |
| Biodegradation     |                                                                                |   |                                                                      | k <sub>bact</sub> [L cell <sup>-1</sup> s <sup>-1</sup> ] |                       |
| R33                | HCOOH/HCOO <sup>-</sup> + Bacteria                                             | → | Products                                                             | 1.5·10 <sup>-13</sup>                                     |                       |
| R34                | CH <sub>3</sub> COOH/CH <sub>3</sub> COO <sup>-</sup> + Bacteria               | → | Products                                                             | 8.7·10 <sup>-14</sup>                                     |                       |

**Table S2.** Aqueous phase equilibria. The data are the same as used in the model study by Khaled et al. (2021).

|     |                                              |                      |                                                              | $K_a$ [M]            |
|-----|----------------------------------------------|----------------------|--------------------------------------------------------------|----------------------|
| E1  | H <sub>2</sub> O                             | $\rightleftharpoons$ | OH <sup>-</sup> + H <sup>+</sup>                             | $1.0 \cdot 10^{-14}$ |
| E2  | HO <sub>2</sub>                              | $\rightleftharpoons$ | O <sub>2</sub> <sup>-</sup> + H <sup>+</sup>                 | $1.60 \cdot 10^{-5}$ |
| E3  | CHOCOOH                                      | $\rightleftharpoons$ | CHOCOO <sup>-</sup> + H <sup>+</sup>                         | $6.60 \cdot 10^{-4}$ |
| E4  | HCOOH                                        | $\rightleftharpoons$ | HCOO <sup>-</sup> + H <sup>+</sup>                           | $1.77 \cdot 10^{-4}$ |
| E5  | H <sub>2</sub> C <sub>2</sub> O <sub>4</sub> | $\rightleftharpoons$ | HC <sub>2</sub> O <sub>4</sub> <sup>-</sup> + H <sup>+</sup> | $6.40 \cdot 10^{-2}$ |
| E6  | HC <sub>2</sub> O <sub>4</sub> <sup>-</sup>  | $\rightleftharpoons$ | C <sub>2</sub> O <sub>4</sub> <sup>2-</sup> + H <sup>+</sup> | $5.25 \cdot 10^{-5}$ |
| E7  | HNO <sub>3</sub>                             | $\rightleftharpoons$ | NO <sub>3</sub> <sup>-</sup> + H <sup>+</sup>                | 22                   |
| E8  | SO <sub>2</sub> ·H <sub>2</sub> O            | $\rightleftharpoons$ | HSO <sub>3</sub> <sup>-</sup> + H <sup>+</sup>               | 0.013                |
| E9  | HSO <sub>3</sub> <sup>-</sup>                | $\rightleftharpoons$ | SO <sub>3</sub> <sup>2-</sup> + H <sup>+</sup>               | $6.60 \cdot 10^{-8}$ |
| E10 | H <sub>2</sub> SO <sub>4</sub>               | $\rightleftharpoons$ | HSO <sub>4</sub> <sup>-</sup> + H <sup>+</sup>               | 1000                 |
| E11 | HSO <sub>4</sub> <sup>-</sup>                | $\rightleftharpoons$ | SO <sub>4</sub> <sup>2-</sup> + H <sup>+</sup>               | 0.102                |
| E12 | NH <sub>3</sub>                              | $\rightleftharpoons$ | NH <sub>4</sub> <sup>+</sup> + OH <sup>-</sup>               | $1.76 \cdot 10^{-5}$ |
| E13 | CH <sub>3</sub> COOH                         | $\rightleftharpoons$ | CH <sub>3</sub> COO <sup>-</sup> + H <sup>+</sup>            | $1.77 \cdot 10^{-5}$ |

**Table S3.** Phase transfer parameters. The parameters are the same as used in the model study by Khaled et al. (2021). The Henry's law constant for acetic acid is the same as used by Brimblecombe and Clegg (1988), its  $\alpha$  and  $D_g$  values are estimated to be same as for similar compounds.

| Species                        | $M_g$<br>[g mol <sup>-1</sup> ] | $\alpha$ | $D_g$<br>[cm <sup>2</sup> s <sup>-1</sup> ] | $K_H$<br>[M atm <sup>-1</sup> ] |
|--------------------------------|---------------------------------|----------|---------------------------------------------|---------------------------------|
| O <sub>3</sub>                 | 48                              | 0.05     | 0.148                                       | $1.14 \cdot 10^{-2}$            |
| H <sub>2</sub> O <sub>2</sub>  | 34                              | 0.1      | 0.118                                       | $1.02 \cdot 10^5$               |
| OH                             | 17                              | 0.05     | 0.153                                       | 25                              |
| HO <sub>2</sub>                | 33                              | 0.05     | 0.104                                       | $9 \cdot 10^3$                  |
| HCHO                           | 30                              | 0.02     | 0.164                                       | $4.99 \cdot 10^3$               |
| CH <sub>3</sub> O <sub>2</sub> | 47                              | 0.0038   | 0.135                                       | 310                             |
| CH <sub>3</sub> OOH            | 48                              | 0.0038   | 0.135                                       | 310                             |
| HNO <sub>3</sub>               | 63                              | 0.054    | 0.132                                       | $2.1 \cdot 10^5$                |
| N <sub>2</sub> O <sub>5</sub>  | 108                             | 0.0037   | 0.110                                       | 1.4                             |
| SO <sub>2</sub>                | 64                              | 0.035    | 0.128                                       | 1.23                            |
| HCOOH                          | 46                              | 0.012    | 0.153                                       | 5530                            |
| (CHO) <sub>2</sub>             | 58                              | 0.023    | 0.115                                       | $4.19 \cdot 10^5$               |
| CH <sub>3</sub> COCHO          | 72                              | 0.1      | 0.115                                       | $3.2 \cdot 10^4$                |
| NH <sub>3</sub>                | 17                              | 0.1      | 0.1                                         | 60.7                            |
| CH <sub>3</sub> COOH           | 60                              | 0.1      | 0.1                                         | 5500                            |

**Table S4.** Gas phase formation and loss processes of formic and acetic acids. The full gas phase mechanism is the same as used in Barth et al. (2021).

|     | Reactants                                           |   | Products                                                                                                                                                                                                                     | k [cm <sup>3</sup> s <sup>-1</sup> ] | E <sub>a</sub> /R [K] |
|-----|-----------------------------------------------------|---|------------------------------------------------------------------------------------------------------------------------------------------------------------------------------------------------------------------------------|--------------------------------------|-----------------------|
| Rg1 | Isoprene + O <sub>3</sub>                           | → | 0.2 CH <sub>3</sub> COOH + 0.1 OH + 0.27 HO <sub>2</sub> +<br>0.06 HO <sub>2</sub> + 0.6 HCHO + CH <sub>3</sub> COOH +<br>0.4 MACR + 0.3 MVK + 0.07 C <sub>3</sub> H <sub>6</sub> +<br>0.2 CH <sub>3</sub> (O)O <sub>2</sub> | 9.6·10 <sup>-18</sup>                |                       |
| Rg2 | CH <sub>3</sub> (O)O <sub>2</sub> + HO <sub>2</sub> | → | 0.1 O <sub>3</sub> + 0.7 CH <sub>3</sub> C(O)OOH + 0.3<br>CH <sub>3</sub> COOH                                                                                                                                               | 1.8·10 <sup>-11</sup>                | 360                   |
| Rg3 | HCOOH + OH                                          | → | CO <sub>2</sub> + H <sub>2</sub> O + HO <sub>2</sub>                                                                                                                                                                         | 1.5· 10 <sup>-12</sup>               |                       |
| Rg4 | CH <sub>3</sub> COOH + OH                           | → | 0.7 OH + 0.7 CH <sub>3</sub> CHO + 0.3 C <sub>2</sub> H <sub>5</sub> O <sub>2</sub>                                                                                                                                          | 1·10 <sup>-11</sup>                  | 200                   |

**Table S5.** Initial mixing ratios of gas phase species [ppb] and concentrations of aqueous phase species [ $\mu\text{g m}_{air}^{-3}$ ]; all other species are not initialized

| Gas phase species             | Mixing ratio [ppb]                  |
|-------------------------------|-------------------------------------|
| O <sub>3</sub>                | 60                                  |
| H <sub>2</sub> O <sub>2</sub> | 1                                   |
| HCHO                          | 0.1                                 |
| HCOOH                         | 0.5                                 |
| CH <sub>3</sub> COOH          | 0.2                                 |
| HNO <sub>3</sub>              | 1                                   |
| SO <sub>2</sub>               | 2                                   |
| NH <sub>3</sub>               | 1                                   |
| NO                            | 3                                   |
| NO <sub>2</sub>               | 0.1                                 |
| CO                            | 150                                 |
| Isoprene                      | 1                                   |
| Toluene                       | 2                                   |
| Ethylene                      | 0.5                                 |
| CH <sub>4</sub>               | 1850 (const.)                       |
| Aqueous phase species         | Concentration                       |
| WSOC                          | 20 $\mu\text{M}$                    |
| Bacteria cells                | 0.1 cm <sup>-3</sup> <sub>air</sub> |

**Table S6.** Rates for all processes shown in Figure 6, at the end of 1-hour simulation time and for  $D_d = 20 \mu\text{m}$ . The upper part of the table lists the rates in units of  $10^{-16} \text{ mol g}_{\text{air}}^{-1} \text{ s}^{-1}$ . These numbers allow the comparison of rates related scaled by the aqueous phase volumes. The bottom part of the table reports the same rates (only aqueous phase) in units of  $10^{-9} \text{ mol L}_{\text{aq}}^{-1} \text{ s}^{-1}$ . These units allow comparing the two droplet classes. If the chemical composition were identical in both classes, the rates should be identical, too. Any deviation is caused by the biodegradation in drop class 2.

| Acid        | pH  | $PT_1$                                                    | $S_{aq1}$ | $L_{aq1}$            | $PT_2$ | $S_{aq2}$ | $L_{aq2}$            | $L_{Bact}$ | $S_g$ | $L_g$  |
|-------------|-----|-----------------------------------------------------------|-----------|----------------------|--------|-----------|----------------------|------------|-------|--------|
|             |     | $10^{-16} \text{ mol g}_{\text{air}}^{-1} \text{ s}^{-1}$ |           |                      |        |           |                      |            |       |        |
| Formic acid | 3   | -2.5                                                      | 2.9       | -0.45                | 0.87   | 0.003     | $-4 \cdot 10^{-4}$   | -0.87      | 0     | -0.77  |
|             | 4.6 | 3.7                                                       | 5.3       | 14                   | 2.0    | 0.006     | -0.011               | -2.0       | 0     | -0.22  |
|             | 5.6 | 1.2                                                       | 11        | 27                   | 0.49   | 0.013     | -0.008               | -0.5       | 0     | -0.015 |
| Acetic acid | 3   | -3.0                                                      | 3.1       | -0.004               | 0.15   | 0.003     | $-3.5 \cdot 10^{-6}$ | -0.15      | 0.38  | -6.4   |
|             | 4.6 | -8.2                                                      | 8.9       | -0.05                | 0.31   | 0.009     | $-5 \cdot 10^{-5}$   | -0.32      | 0.85  | -5.4   |
|             | 5.6 | -10                                                       | 16        | -0.74                | 0.98   | 0.02      | $-7 \cdot 10^{-4}$   | -1.0       | 1.1   | -3.4   |
|             |     | $10^{-9} \text{ mol L}_{\text{aq}}^{-1} \text{ s}^{-1}$   |           |                      |        |           |                      |            |       |        |
| Formic acid | 3   | -0.61                                                     | 0.72      | -0.11                | 210    | 0.72      | -0.11                | -210       |       |        |
|             | 4.6 | 0.91                                                      | 1.3       | -3.5                 | 500    | 1.4       | -2.8                 | -500       |       |        |
|             | 5.6 | 0.3                                                       | 2.8       | -6.6                 | 120    | 3.1       | -2.0                 | -120       |       |        |
| Acetic acid | 3   | -0.74                                                     | 0.76      | $-8.7 \cdot 10^{-4}$ | 37     | 0.76      | $-8.5 \cdot 10^{-4}$ | -38        |       |        |
|             | 4.6 | -2.0                                                      | 2.2       | -0.012               | 77     | 2.2       | -0.012               | -79        |       |        |
|             | 5.6 | -2.5                                                      | 4.0       | -0.18                | 240    | 4.6       | -0.17                | -250       |       |        |

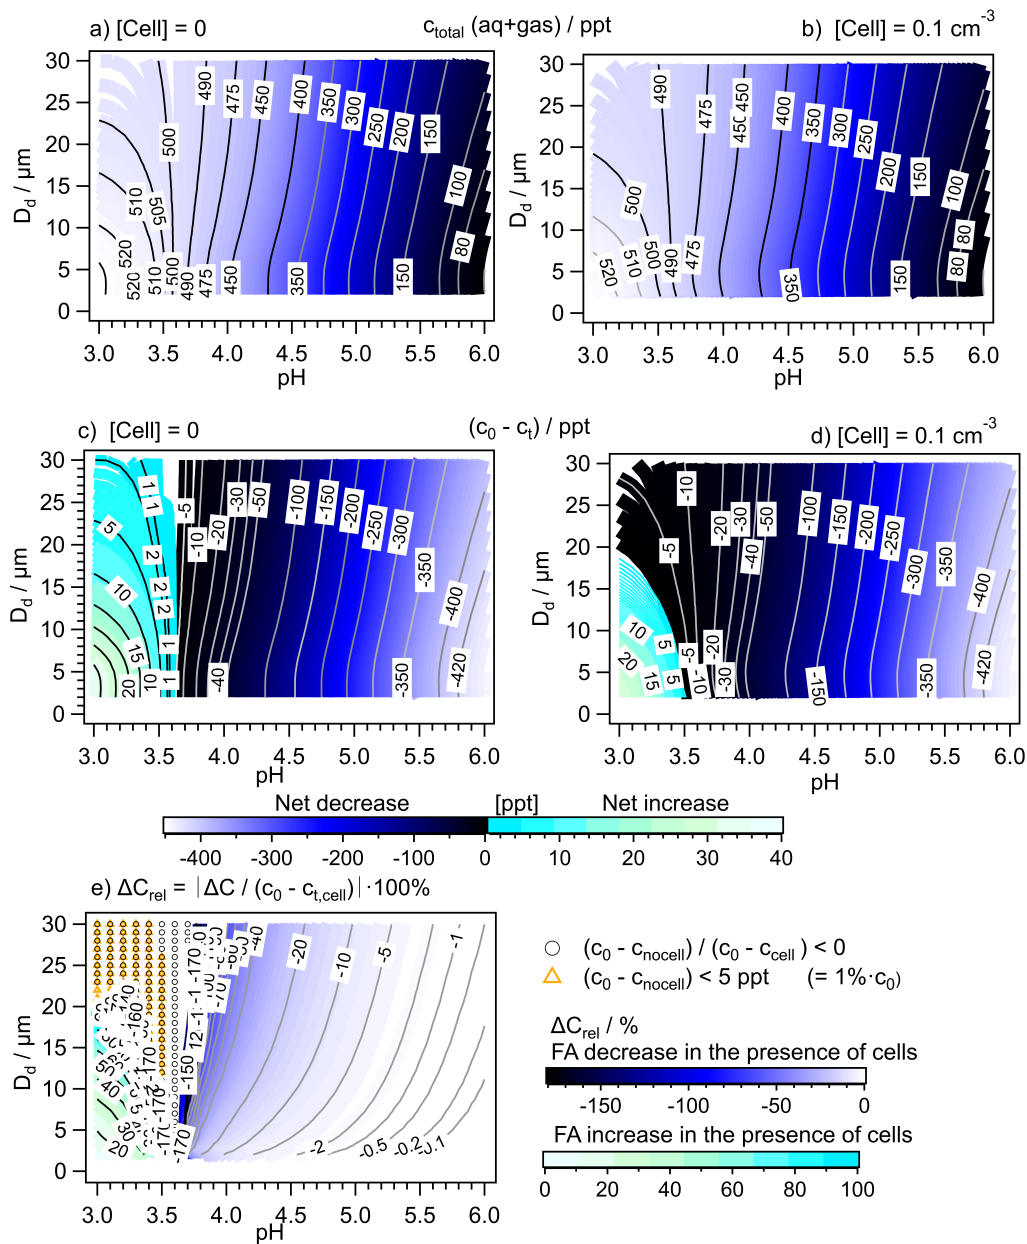

**Figure S1.** Results from 900 1-hour simulations (30 pH values, 30 drop diameters, Total formic acid concentrations (gas + aqueous) and absolute concentration difference ( $c_0 - c_t$ ) in the absence of bacteria (a, c) and in the presence of bacteria (b, d). e) Relative difference in concentration due to bacteria according to Equation 6. The threshold of  $c_0 - c_{t,\text{nocell}}$  in panel e) is chosen to avoid displaying very high values by dividing by an irrelevant small concentration difference

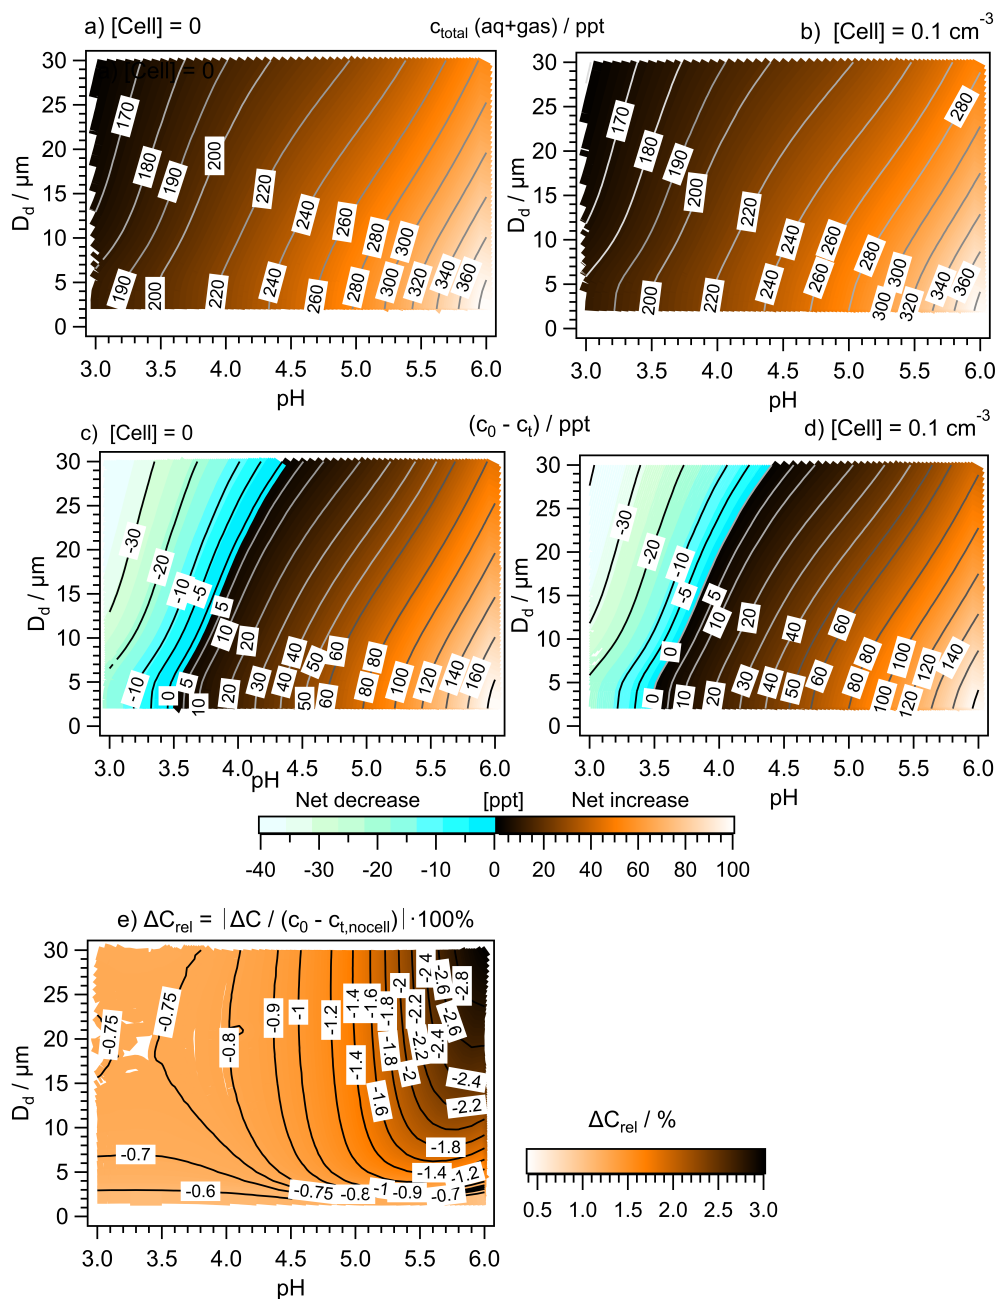

**Figure S2.** Results from 900 1-hour simulations (30 pH values, 30 drop diameters, Total acetic acid concentrations (gas + aqueous) and absolute concentration difference ( $(c_0 - c_t)$ ) in the absence of bacteria (a, c) and in the presence of bacteria (b, d). e) Relative difference in concentration due to bacteria according to Equation 6

## S1 Derivation of the factor $q$ based on the model studies by Fankhauser et al. (2019) and Pailler et al. (2023)

The study by Fankhauser et al. (2019) provides predicted aqueous and gas phase concentrations in the absence and presence of bacteria cells. Pailler et al. (2023) reports aqueous phase concentrations and total concentrations (gas + aqueous). Based on their figures, we are able to derive (approximate)  $q$  values to explore the extent to which uptake limitations occurred. The  $q$  value is defined as the ratio of predicted aqueous and gas phase concentrations divided by the Henry's law constant (Equation 14)

Figure 2 by Fankhauser et al. (2019) shows aqueous phase concentrations of  $\sim 0.3 \cdot 10^{-5} M$  and  $\sim 0$  in the absence and presence of bacteria cells, respectively. For both simulations, their Figure S3 shows a gas phase concentration of  $\sim 2 \cdot 10^9 \text{ molec cm}^{-3}$ . In the absence of bacteria cells, their concentration ratio is, thus,

$$\frac{c_{aq}[M]}{p_g[atm]} = \frac{0.3 \cdot 10^{-5} M}{2 \cdot 10^9 \text{ molec cm}^{-3} / 2.5 \cdot 10^{19} \text{ molec cm}^{-3} \text{ atm}^{-1}} \sim 37800 M \text{ atm}^{-1} \quad (S1)$$

This concentration ratio corresponds to

$$q = \frac{C_{aq}}{p_g K_{H,eff}} = \frac{37800 M \text{ atm}^{-1}}{36500 M \text{ atm}^{-1}} \sim 1 \quad (S2)$$

indicating thermodynamic equilibrium between the gas and aqueous phases in absence of bacteria and biodegradation.

In the presence of bacteria cells, the aqueous phase concentration was basically completely depleted ( $\sim 0$ , Fankhauser et al. (2019)'s Figure 2B) implying a  $q$  value much lower than unity by several orders of magnitude, and also lower than our value of  $q \sim 0.8$  predicted for bacteria-containing droplets (our Figure 5c). We cannot reconcile the reasons for this difference by several orders of magnitude. However, the significantly lower  $q$  based on the results by Fankhauser et al. (2019) suggests that there was no thermodynamic equilibrium between the gas and aqueous phases in their model and that despite a relatively high gas phase concentration, the phase transfer was not sufficiently fast to replenish the formic acid concentration in the aqueous phase. Therefore, we conclude that the biodegradation of formic acid in Fankhauser's model was *significantly limited* due to the relatively inefficient uptake of formic acid from the gas phase (and chemical production within the droplet) as compared to the efficient loss by biodegradation.

Since Fankhauser et al. (2019) do not report gas phase concentrations of acetic acid, we cannot perform the corresponding analysis for this acid. However, given that the aqueous phase concentration was only  $\sim 10\%$  lower in the presence of bacteria may imply that the biodegradation did not lead to such strong subsaturation of acetic acid in the droplets, in agreement with our results ( $q(\text{acetic acid}) \sim 1$  at pH = 4.5, Figure 5b).

Pailler et al. (2023) report that net phase transfer rates in their simulations are zero in the presence and absence of bacteria, indicating thermodynamic equilibrium. This claim can be corroborated by an estimate of the corresponding  $q$  value based on their Figures 3 and 6 (very approximate since the exact data were not given in table form): E.g. for day conditions during summer in the presence of bacteria cells:  $c_{aq}(\text{HCOOH}) \sim 20 \mu\text{M}$ ,  $c_{total}(\text{HCOOH}) \sim 3.6 \cdot 10^9 \text{ molec cm}^{-3}$  results in

$$\frac{c_{aq}[M]}{p_g[atm]} = \frac{20 \cdot 10^{-6} M}{(4.3 \cdot 10^9 - 3.6 \cdot 10^9) \text{ molec cm}^{-3} / 2.5 \cdot 10^{19} \text{ molec cm}^{-3} \text{ atm}^{-1}} = 7 \cdot 10^5 M \text{ atm}^{-1} \quad (S3)$$

leading to

$$q = \frac{7 \cdot 10^5 M \text{ atm}^{-1}}{5.2 \cdot 10^5 M \text{ atm}^{-1}} \sim 1 \quad (S4)$$

whereas the denominator is the effective Henry's law constant for pH = 5.5. using the  $K_H$  and  $K_a$  as applied in the CLEPS mechanism that is used by Pailler et al. (2023). This result shows that in their model, the aqueous phase concentration was not limited by uptake and the acids were in thermodynamic equilibrium.

## S2 Temperature dependence of biodegradation

Figure S3 shows  $k_{bact}$  vs  $T^{-1}$  [ $K^{-1}$ ] (Table S7) compared to the corresponding trends for the OH reactions of formic acid/formate and acetic acid/acetate. This comparison suggests that the temperature dependencies for acetic acid are similar whereas the biodegradation of formic acid/formate seems more strongly T-dependent than the corresponding OH reactions.

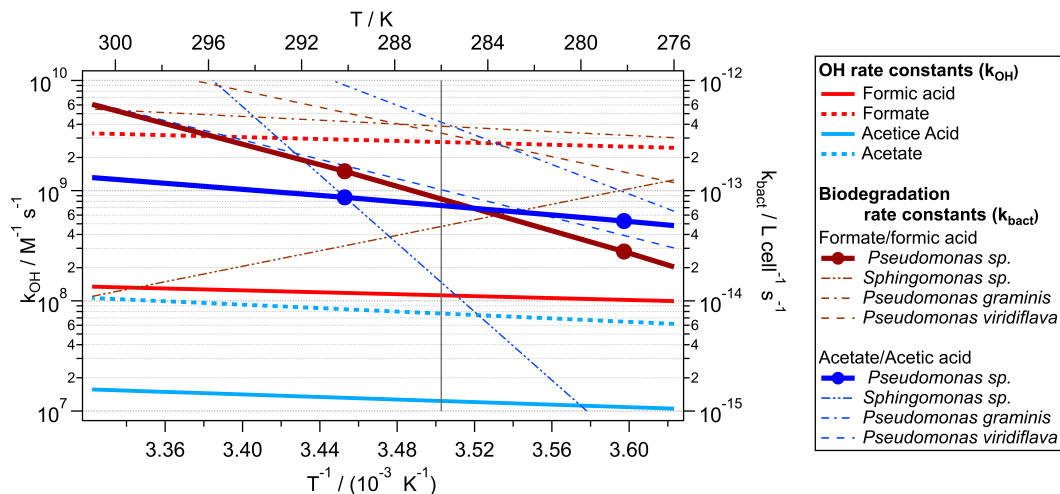

**Figure S3.** Temperature dependencies for chemical rate constants for the OH reactions ( $k_{OH}$ ) and biodegradation ( $k_{bact}$ ) of formic and acetic acids. The temperature dependencies for the OH reactions are taken from Chin and Wine (1994), while bacterial species data were derived by Khaled et al. (2021) based on the measurements by Vaitilingom et al. (2010) at 278.15 K and 290.15 K. The vertical lines denotes the temperature at which the model simulation were performed.

**Table S7.**  $k_{bact}$  values for formic and acetic acid, (Khaled et al., 2021) based on the measured biodegradation rates by (Vaitilingom et al., 2010)

| Species                       | $k_{bact}(17^{\circ}\text{C})$<br>/ $10^{-13} \text{ L cell}^{-1} \text{ s}^{-1}$ | $k_{bact}(5^{\circ}\text{C})$ |
|-------------------------------|-----------------------------------------------------------------------------------|-------------------------------|
| Formic acid                   |                                                                                   |                               |
| <i>Sphingomonas sp.</i>       | 0.3                                                                               | 1.0                           |
| <i>P. graminis</i>            | 4.3                                                                               | 3.2                           |
| <b><i>Pseudomonas sp.</i></b> | <b>1.5</b>                                                                        | 0.28                          |
| <i>P. viridiflava</i>         | 5.4                                                                               | 1.5                           |
| Acetic acid                   |                                                                                   |                               |
| <i>Sphingomonas sp.</i>       | 1.1                                                                               | 0.0054                        |
| <i>P. graminis</i>            | 10                                                                                | 1.0                           |
| <b><i>Pseudomonas sp.</i></b> | <b>0.87</b>                                                                       | 0.53                          |
| <i>P. viridiflava</i>         | 1.8                                                                               | 0.4                           |

Using the Arrhenius equation

$$k_2 = k_1 \cdot \exp \left[ -\frac{E_a}{R} \left( \frac{1}{T_2} - \frac{1}{T_1} \right) \right] \quad (\text{S5})$$

we can derive the activation energies  $E_a$  of the biodegradation processes as 90 kJ mol<sup>-1</sup> and 27 kJ mol<sup>-1</sup> for *Pseudomonas sp.*, but with large ranges of (-65 - +90 kJ mol<sup>-1</sup> and 273 - 285 kJ mol<sup>-1</sup>) for all species investigated by (Väitilingom et al., 2010). Using the  $E_a$  values, the biodegradation rates at our model temperature would have been  $\sim 40\%$  and  $\sim 13\%$  lower than the measurements at 17 °C.

However, given the uncertainties associated with the measured biodegradation rates and their derived temperature dependencies (based on the two data points only!), we do not put much confidence into the derived temperature dependencies. This uncertainty is even further supported by the large scatter of values and slopes for the temperature dependent values of the other bacteria species measured by Väitilingom et al. (2010) (Figure S3). Considering these large uncertainties, the use of the directly measured data at 17°C seems justified.

Activation energies for biodegradation processes are rarely measured directly. A study on biodegradation of aromatic compounds showed an average value of 65 kJ mol<sup>-1</sup> (Knudsmark Sjøholm et al., 2021) which is within the range of the values determined (for quite different organic species).

The comparison of the  $E_a$  values for the OH reactions of the acids show similar trend but much lower values as compared to those for biodegradation with 8 kJ mol<sup>-1</sup> and 9 kJ mol<sup>-1</sup> for formic acid and formate and 11 kJ mol<sup>-1</sup> and 15 kJ mol<sup>-1</sup> for acetic acid and acetate (Chin and Wine, 1994).

The temperature dependence for biological processes is often expressed by means of the  $Q_{10}$  factor according to

$$R_{cell}(T_2) = R_{cell}(T_1) \cdot Q_{10}^{(T_2-T_1)/10} \quad (\text{S6})$$

i.e., the  $Q_{10}$  factor quantifies the change in the rate constant in a temperature interval of 10 K

$$Q_{10} = \frac{k_2}{k_1} \quad (\text{S7})$$

Based on Equation S7, we derived  $Q_{10}$  values for the temperature interval 285 - 295 K (Table S8). They are in general agreement with those for cell generation rates ( $\sim 2 \leq Q_{10} \leq \sim 3$ ). By combining Equations S5 and S6, one can derive a simple relationship of  $Q_{10}$  and  $E_a$ , which is valid if  $T_1$  and  $T_2$  differ by 10 K (i.e.  $(T_2-T_1)/10 = 1$ ):

$$Q_{10} = \exp \left[ -\frac{E_a}{R} \left( \frac{1}{T_2} - \frac{1}{T_1} \right) \right] \quad (\text{S8})$$

**Table S8.**  $Q_{10}$  factors ( $12^\circ\text{C} \leq T \leq 22^\circ\text{C}$ ) and activation energies derived from the biodegradation rates measured at 5°C and 17°C by Väitilingom (2010).  $Q_{10}$  is temperature dependent and only valid for the indicated specific temperature interval.

|                                | Formic acid |                             | Acetic acid |                             |
|--------------------------------|-------------|-----------------------------|-------------|-----------------------------|
|                                | $Q_{10}$    | $E_a$ /kJ mol <sup>-1</sup> | $Q_{10}$    | $E_a$ /kJ mol <sup>-1</sup> |
| <i>Pseudomonas sp.</i>         | 3.9         | 90                          | 1.5         | 27                          |
| <i>Sphingomonas sp.</i>        | 0.4         | -65                         | 72          | 286                         |
| <i>Pseudomonas graminis</i>    | 1.3         | 16                          | 6.4         | 124                         |
| <i>Pseudomonas viridiflava</i> | 2.8         | 69                          | 3.4         | 81                          |

## References

- Barth, M. C., Ervens, B., Herrmann, H., Tilgner, A., McNeill, V. F., Tsui, W. G., Deguillaume, L., Chaumerliac, N., Carlton, A. G., and Lance, S.: Box Model Intercomparison of Cloud Chemistry, *Journal of Geophysical Research Atmospheres*, 126, e2021JD035486, <https://doi.org/10.1029/2021JD035486>, 2021.
- 5 Brimblecombe, P. and Clegg, S. L.: The Solubility and Behaviour of Acid Gases in the Marine Aerosol, *J. Atmos. Chem.*, 7, 1–18, 1988.
- Chin, M. and Wine, P. H.: A temperature-dependent competitive kinetics study of the aqueous-phase reactions of OH radicals with formate, formic acid, acetate, acetic acid and hydrated formaldehyde, in: *Aquatic and Surface Photochemistry*, edited by Helz, G. R., Zepp, R. G., and Crosby, D. G., pp. 85–96, Lewis Publishers, Boca Raton, 1994.
- Fankhauser, A. M., Antonio, D. D., Krell, A., Alston, S. J., Banta, S., and McNeill, V. F.: Constraining the Impact of Bac-  
10 teria on the Aqueous Atmospheric Chemistry of Small Organic Compounds, *ACS Earth and Space Chemistry*, 3, 1485–1491, <https://doi.org/10.1021/acsearthspacechem.9b00054>, 2019.
- Khaled, A., Zhang, M., Amato, P., Delort, A.-M., and Ervens, B.: Biodegradation by bacteria in clouds: an underestimated sink for some organics in the atmospheric multiphase system, *Atmospheric Chemistry and Physics*, 21, 3123–3141, <https://doi.org/10.5194/acp-21-3123-2021>, 2021.
- 15 Knudsmark Sjøholm, K., Birch, H., Hammershøj, R., Saunders, D. M. V., Dechesne, A., Loibner, A. P., and Mayer, P.: Determining the Temperature Dependency of Biodegradation Kinetics for 34 Hydrocarbons while Avoiding Chemical and Microbial Confounding Factors, *Environmental Science & Technology*, 55, 11 091–11 101, <https://doi.org/10.1021/acs.est.1c02773>, 2021.
- Pailler, L., Wirgot, N., Joly, M., Renard, P., Mouchel-Vallon, C., Bianco, A., Leriche, M., Sancelme, M., Job, A., Patryl, L., Armand, P., Delort, A.-M., Chaumerliac, N., and Deguillaume, L.: Assessing the efficiency of water-soluble organic compound biodegradation in  
20 clouds under various environmental conditions, *Environmental Science: Atmospheres*, 3, 731–748, <https://doi.org/10.1039/D2EA00153E>, 2023.
- Väitilingom, M., Amato, P., Sancelme, M., Laj, P., Leriche, M., and Delort, A.-M.: Contribution of Microbial Activity to Carbon Chemistry in Clouds, *Applied and Environmental Microbiology*, 76, 23–29, <https://doi.org/10.1128/AEM.01127-09>, 2010.
